# Supplementary figures and images for: Dissimilar Friction Stir Welding of AA2519 and AA5182
Source: MDPI journal article supplement (doi:10.3390/ma15248776), 2022-12-08

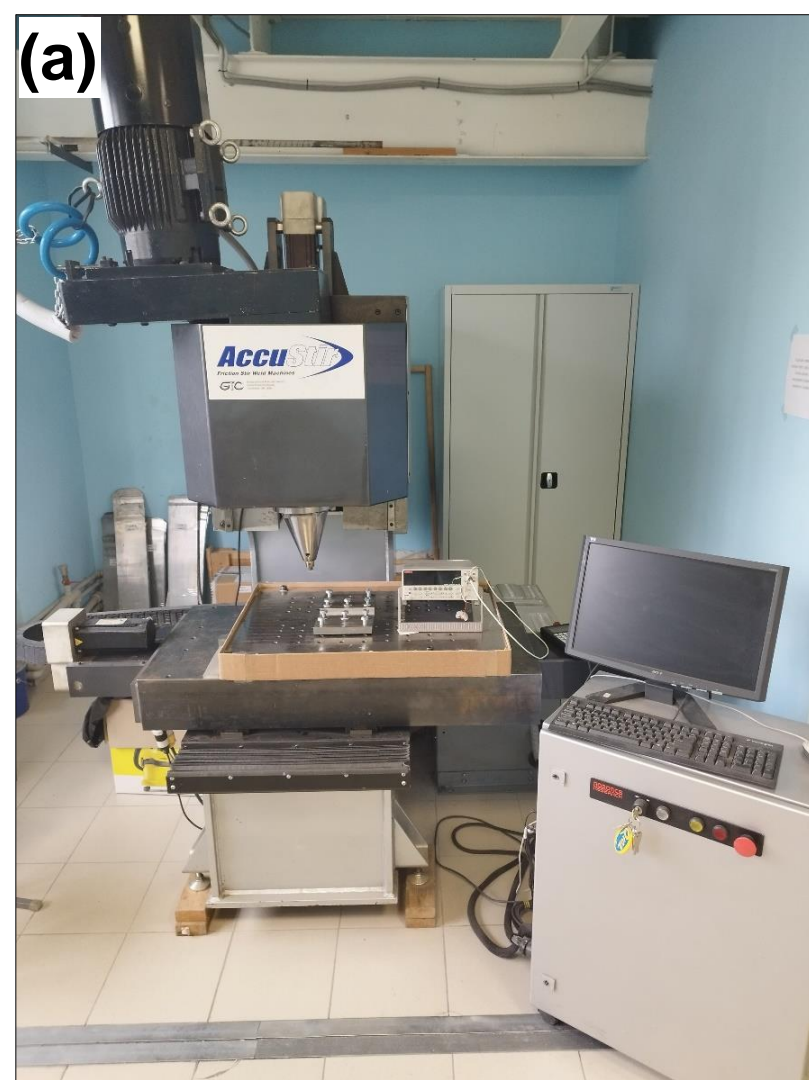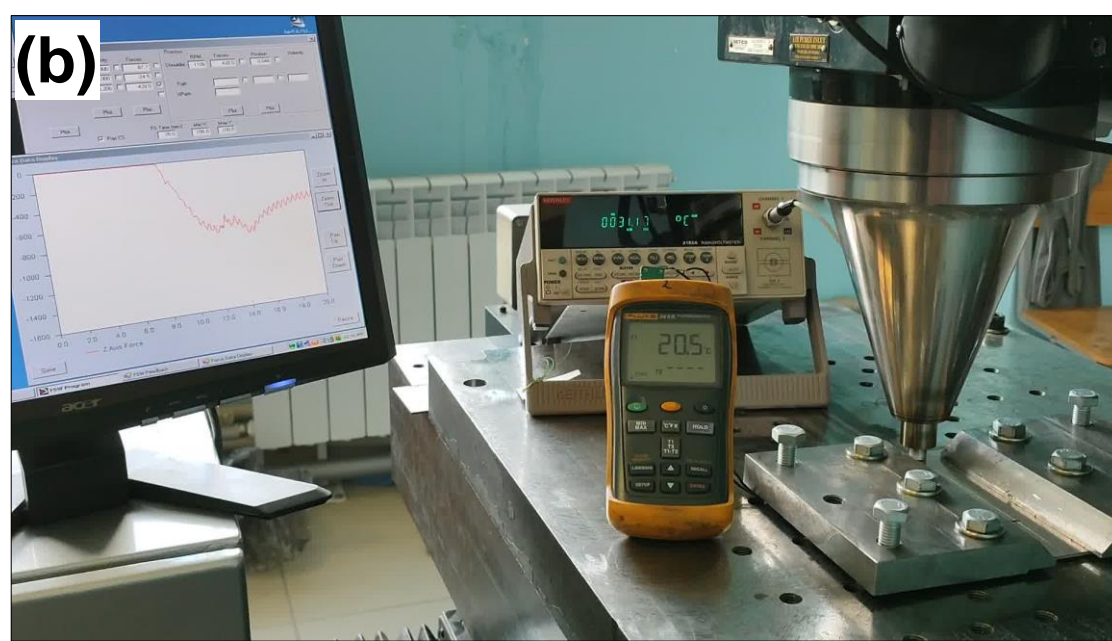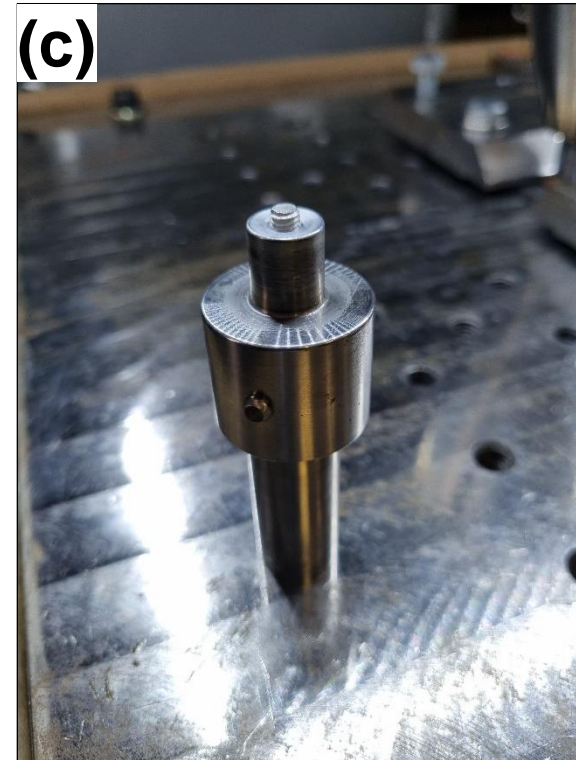

**Supplementary Figure S1.** Photographs of used FSW-machine (a), experiment setup (b) and tool (c).

Supplement: s1 [file s1]
